*B. garinii* in the northwestern Atlantic

1 **Population structure of *Borrelia garinii* from *Ixodes uriae* collected in seabird colonies of**  
2 **the northwestern Atlantic Ocean**

3

4 Running title: *B. garinii* population structure in the northwestern Atlantic

5

6 Hannah J. Munro<sup>1</sup>, Nicholas H. Ogden<sup>2,3</sup>, Samir Mechai<sup>3</sup>, L. Robbin Lindsay<sup>4</sup>, Gregory J.

7 Robertson<sup>5</sup>, Hugh Whitney<sup>1</sup>, and Andrew S. Lang<sup>1#</sup>

8

9 1. Department of Biology, Memorial University of Newfoundland, St. John's, Newfoundland  
10 and Labrador, A1B 3X9, Canada

11 2. Public Health Risk Sciences Division, National Microbiology Laboratory, Public Health  
12 Agency of Canada, Saint-Hyacinthe, Québec, J2S 2M2, Canada

13 3. Groupe de Recherche en Épidémiologie des Zoonoses et Santé Publique, Faculté de Médecine  
14 Vétérinaire, Université de Montréal, Saint-Hyacinthe, Québec, J2S 2M2, Canada

15 4. National Microbiology Laboratory, Public Health Agency of Canada, Winnipeg, Manitoba,  
16 R3E 3R2, Canada

17 5. Wildlife Research Division, Environment and Climate Change Canada, Mount Pearl,  
18 Newfoundland and Labrador, A1N 4T3, Canada

19

20 # Corresponding author: Andrew S. Lang, [aslang@mun.ca](mailto:aslang@mun.ca)

## *B. garinii* in the northwestern Atlantic

### 21 **Abstract**

22           The occurrence of *Borrelia garinii* in seabird ticks, *Ixodes uriae*, associated with different  
23 species of colonial seabirds has been studied since the early 1990s. Research on the population  
24 structure of this bacterium in ticks from seabird colonies in the northeastern Atlantic Ocean has  
25 revealed admixture between marine and terrestrial tick populations. We studied *B. garinii*  
26 population structure in *I. uriae* collected from seabird colonies in the northwestern Atlantic  
27 Ocean, in Newfoundland and Labrador, Canada. We applied a multi-locus sequence typing  
28 (MLST) scheme to *B. garinii* found in ticks from four species of seabirds. The *B. garinii* strains  
29 found in this seabird colony ecosystem were diverse. Some were very similar to strains from  
30 Asia and Europe, including some obtained from human clinical samples, while others formed a  
31 divergent group specific to this region of the Atlantic Ocean.

32

### 33 **Importance**

34           This study provides the first *B. garinii* sequences from North American seabird ticks that  
35 were characterized using an MLST approach. This revealed new MLST sequence types and  
36 alleles, enhancing our knowledge of *B. garinii* diversity. Our findings highlight the genetic  
37 complexity of *B. garinii* circulating among seabird ticks and their avian hosts but also  
38 demonstrate surprisingly close connections between *B. garinii* in this ecosystem and terrestrial  
39 sources in Eurasia. Genetic similarities among *B. garinii* from seabird ticks and humans indicate  
40 the possibility that *B. garinii* circulating within seabird tick-avian host transmission cycles could  
41 directly, or indirectly via connectivity with terrestrial transmission cycles, have consequences for  
42 human health.

## *B. garinii* in the northwestern Atlantic

### 43 **Introduction**

44 *Borrelia burgdorferi* sensu lato (s.l.) is a bacterial species complex that includes the  
45 causative agents of Lyme disease, the most common vector-borne disease in the Northern  
46 Hemisphere. In North America, *B. burgdorferi* sensu stricto (s.s.) is the only genospecies known  
47 to cause Lyme disease in humans to-date, even though several other members of the species  
48 complex have been isolated from ticks in the family Ixodidae on the continent (1-4). *Borrelia*  
49 *burgdorferi* is transmitted to humans in North America by *Ixodes scapularis* (in eastern, central,  
50 and southern regions) and *I. pacificus* (in western, particularly Pacific coastal, areas). In Eurasia,  
51 *B. afzelii*, *B. garinii*, *B. burgdorferi* and other *Borrelia* spp. are known to cause Lyme disease in  
52 humans (5-7). The main vectors are *I. ricinus* in western Europe and *I. persulcatus* in eastern  
53 Europe and Asia. Reservoir hosts vary among the bacterial genospecies, with *B. afzelii*  
54 associated with rodents, *B. garinii* associated with birds, and *B. burgdorferi* s.s. a generalist for  
55 which both birds and rodents are reservoirs (8).

56 The transmission cycles of these bacteria, and the risk of human exposure to infected  
57 ticks, generally occur in woodland habitats in which ticks can survive during non-parasitic  
58 periods of their lifecycle, and where the mammalian and avian hosts for the ticks and bacteria are  
59 found (9). However, *B. garinii* was also found in *I. uriae* feeding on Razorbills (*Alca torda*) in  
60 the early 1990s in a seabird colony off the coast of Sweden (10). Other seabirds, such as puffins  
61 (11), are now also recognized as competent reservoirs of this bacterium, and humans can be  
62 infected via *I. uriae* (11). The distribution and prevalence of *B. garinii* in *I. uriae* has now been  
63 studied in seabird colonies worldwide, and it has been found associated with a variety of seabird  
64 species in both the Northern and Southern Hemispheres (12-15).

65 The circulation of *B. garinii* in the seabird reservoir is complex (15), spanning a huge  
66 geographic range with many possible vertebrate hosts but *I. uriae* as the only known vector

## *B. garinii* in the northwestern Atlantic

67 species. More genetic diversity has been found in the marine *I. uriae*-*B. garinii* system compared  
68 to the terrestrial realm involving *I. ricinus* (16). There is evidence of transhemispheric-scale *B.*  
69 *garii* movements based on the presence of identical marker gene sequences in both the  
70 Northern and Southern Hemispheres (12), shared genetic structure between the Atlantic and  
71 Pacific Ocean basins (15), and little apparent genetic population structure within these ocean  
72 basins (15). Recombination analysis has also demonstrated admixture between the terrestrial and  
73 marine genetic pools (15) and it is therefore important to study both the marine and terrestrial *B.*  
74 *garii* cycles to understand circulation of this bacterium.

75         The genome of *B. burgdorferi* s.l. consists of a linear chromosome, which carries the  
76 genes for cell maintenance and replication, and a large number of linear and circular plasmids,  
77 which encode most of the outer surface proteins (Osp) that mediate interactions with hosts and  
78 vectors (17). Previously, DNA-DNA hybridization and 23S-5S intergenic spacer (IGS)  
79 sequences were used to delineate *Borrelia* species (5, 18). Attempts to classify strains have also  
80 utilized 16S-23S intergenic spacer (IGS) sequences (19, 20) and the plasmid-encoded *ospA* and  
81 *ospC* genes (21, 22). Multi-locus sequence typing (MLST), using core housekeeping genes, has  
82 become more widely used (19, 23-25) as this allows for analysis at multiple genetic levels, from  
83 delineation of species (26) to exploration of population structure (24).

84         Previous studies have documented *B. garinii* in seabird colonies and shown genetic  
85 evidence for linkage between strains in terrestrial and marine environments (15, 27), but samples  
86 from North American seabird colonies have never been included. Here we characterize the  
87 population structure of *B. garinii* circulating within seabird colonies in the northwestern Atlantic  
88 Ocean. To our knowledge, this represents the first sequence-based study from this region. Using  
89 an MLST scheme (23) that is currently considered the gold-standard and which has been applied

## *B. garinii* in the northwestern Atlantic

90 to multiple *Borrelia* species and strains worldwide we examined the population structure of *B.*  
91 *garii* in *I. uriae* in this marine ecosystem and how it relates to *B. garinii* found throughout  
92 Eurasia.

93

## 94 **Results**

### 95 **Identification of *B. garinii* sequence types**

96 A total of 20 *B. garinii*-positive *I. uriae* collected from four seabird colonies in the  
97 northwestern Atlantic Ocean (Figure 1) were used in this study. Nucleotide sequences for eight  
98 MLST loci were determined and used to define sequence types (STs). This produced 12 different  
99 STs, 10 of which were novel (assigned ST numbers 684 and 686-694). The novel STs contained  
100 26 new alleles and 18 that already existed within the pubMLST database (Supplementary Table  
101 S1). Only two previously identified STs were found: ST244 and ST575. The richness of neither  
102 STs nor alleles reached saturation in a species accumulation analysis (Supplementary Figure S1),  
103 indicating that increased sampling would result in more unique STs and alleles within this  
104 population.

105 The 12 identified STs were distributed across the four colonies and were identified in  
106 ticks collected from four seabird hosts (Table 1). The two previously described STs were found  
107 on Gull Island (ST244 and ST575) and Little Fogo Islands (ST575), in ticks collected near (and  
108 presumed to have fed on) breeding Common Murres (*Uria aalge*) and Atlantic Puffins  
109 (*Fratercula arctica*), respectively. Novel STs were found at all colonies and associated with all  
110 seabird species investigated. The richness (the number of STs per location or seabird host) did  
111 not differ between Gull Island and other locations or between Common Murre and other hosts.  
112 Of the 12 STs identified, unique STs (those not found at another location or associated with  
113 another host) were found at each location except for Little Fogo Islands, and were associated

## *B. garinii* in the northwestern Atlantic

114 with both Common Murres and other seabird hosts (Table 1, Supplementary Table S2,  
115 Supplementary Figure S2). The proportion of samples carrying unique STs did not differ  
116 between Gull Island and other locations (Fisher exact test,  $\chi^2 = 0.016$ ,  $p = 0.90$ ), or between  
117 Common Murre and other seabird hosts (Fisher exact test,  $\chi^2 = 0.730$ ,  $p = 0.39$ ). The relationship  
118 between ST richness based on geographic location and host were not independent, with the  
119 majority of the samples from Gull Island originating from Common Murres (10 out of 13)  
120 whereas at other locations the distribution of ticks among presumed host species was more even  
121 (3 out of 7).

### **Phylogenetic relationships**

123 The sequences found in our study were phylogenetically diverse, with two sequences  
124 branching alone and the others falling into three multi-sequence clades (Figure 2, Supplementary  
125 Table S2). Two of these clades, C1 and C4, contained sequences from multiple locations and  
126 different host bird species. Each of these clades contained one of the two previously identified  
127 STs and clade C4 also contained additional reference sequences from Europe. The third multi-  
128 sample clade, C5, contained sequences exclusively from Common Murres on Gull Island and no  
129 reference sequences. One of the lone sequences, C2, was basal to clade C1, sharing 99.8%  
130 nucleic acid identity with sequences in C1 but differing at every locus with the closest pre-  
131 existing ST. The second lone sequence, C3, was basal to a clade of sequences from Europe, with  
132 which it shared no alleles at 100% identity.

### **Population genetic structure**

134 Pairwise  $F_{ST}$  values (Table 2) indicated genetic differentiation and population structuring  
135 among localities and tick host species. Comparison of STs from Little Fogo Islands and Great  
136 Island showed the highest genetic differentiation values ( $F_{ST} = 0.733$ ,  $p < 0.01$ ). Lesser, but still  
137 significant, genetic differentiation was found between STs from Little Fogo Islands and Gull

## *B. garinii* in the northwestern Atlantic

138 Island ( $F_{ST} = 0.228$ ,  $p < 0.01$ ). The Gannet Islands showed significant differentiation from Gull  
139 Island ( $F_{ST} = 0.049$ ,  $p < 0.01$ ) but less than found between Little Fogo Islands and the islands in  
140 Witless Bay (Gull and Great Islands). Atlantic Puffin STs showed differentiation from all other  
141 species, with the largest value for genetic differentiation being from Razorbills ( $F_{ST} = 0.695$ ,  $p <$   
142  $0.01$ ) and the least with Common Murres ( $F_{ST} = 0.248$ ,  $p < 0.01$ ). Genetic differentiation varied  
143 more among host species than geographic localities/colonies.

144 We performed an eBURST analysis with all 130 *B. garinii* STs, which revealed that the  
145 samples clustered into 21 clonal complexes (using the single-locus variant criterion; SLV) and  
146 63 singletons with eight possible founders. The 12 STs found in this study clustered into four  
147 clonal complexes when either SLVs or both SLVs and double-locus variants (DLVs) were  
148 included, including three singletons (Figure 3, Supplementary Table S2). In this analysis only  
149 one clonal complex had an inferred founder, ST244, previously identified in tick and human  
150 samples from Germany, Russia, and the UK.

151 We also performed a Bayesian Analysis of Population Structure (BAPS), which  
152 suggested the existence of five subpopulations (Figure 3, Supplementary Table S2) with the  
153 highest log marginal likelihood values. These subpopulations showed some geographic  
154 structuring, with all STs from the Gannet Islands clustering together with two STs found on Gull  
155 Island. There were two subpopulations exclusively from Gull Island, and a single ST found on  
156 Great Island formed a solo subpopulation. The final subpopulation contained STs found on Gull  
157 Island, Great Island, and Little Fogo Islands. The subpopulations also showed some host  
158 structuring, with three subpopulations representing STs only found associated with Common  
159 Murres. The remaining two subpopulations contained STs found associated with multiple hosts.

## *B. garinii* in the northwestern Atlantic

160           The BAPS using all *B. garinii* STs supported the existence of three subpopulations, with  
161 one containing our samples from the northwestern Atlantic region. This subpopulation consisted  
162 of samples from across Eurasia and showed no geographic structure. This subpopulation also  
163 contained sequences that originated from a range of sources, including various species of ticks  
164 and ticks collected from humans.

165

## 166 **Discussion**

167           In this study, *B. garinii* within *I. uriae* collected from seabird colonies of the  
168 northwestern Atlantic Ocean were analysed by MLST. This comprehensive genetic analysis of *B.*  
169 *garinii* from North America and this ecological system increases the known genetic diversity of  
170 *B. garinii* and contributes to our understanding of this species globally. We determined that there  
171 is population structure in *B. garinii*, at both regional and global scales. At the regional scale,  
172 sequences show evidence of genetic clustering by both geographic sites and/or seabird hosts.  
173 Sequences found in the northwestern Atlantic region do not all cluster together, which might  
174 reflect several independent introductions of the bacterium into this region and/or prolonged  
175 circulation with diversification over time. There is also similarity of the northwestern Atlantic  
176 sequences to those found in terrestrial ticks and clinical samples from humans in Europe,  
177 suggesting connectivity with non-marine *B. garinii* transmission cycles (15).

178           Although other species of *Borrelia* have been found circulating in the *I. uriae*-seabird  
179 system, including *B. burgdorferi* s.s., *B. bavariensis*, and *B. lusitaniae*, *B. garinii* is predominant  
180 (11, 12, 27, 28). Two STs we found are identical to STs previously identified in Europe. Indeed,  
181 one of these STs has a wide geographic range and is represented by six samples in the pubMLST  
182 database from the UK, Germany, and Russia, and is associated with diverse sources (e.g., human  
183 cerebrospinal fluid, and *I. persulcatus* and *I. ricinus* ticks). We found this ST in a tick collected



## *B. garinii* in the northwestern Atlantic

184 from a Common Murre on Gull Island. The other previously described ST has only been found  
185 in Germany, where it was obtained from a human skin sample collected in 1994.

186         The high level of sequence identity for samples from North American and Eurasian  
187 sources indicates connectivity of *B. garinii* populations across the North Atlantic Ocean.  
188 Furthermore, the documentation of multiple STs in both Eurasia and North America indicate  
189 there are frequent movements of the bacterium between these regions. Possible scenarios for  
190 movement of the bacterium include transport in infected ticks or in infected birds. Although not  
191 impossible, the movement of ticks on seabirds across the Atlantic is unlikely as the period of tick  
192 attachment is 4-8 days (29, 30) while it would take many days to cross the Atlantic Ocean and  
193 land visits by seabird species outside the nesting season along the way are unlikely (31, 32). The  
194 seabirds studied here generally leave their colonies at the end of the breeding season and spend  
195 most of the rest of the year out at sea feeding, with no visits to land before the subsequent  
196 breeding season. Therefore, it is more likely that bacteria are moved between colonies in infected  
197 birds, especially if the birds remain persistently infected, as is often the case for mammalian hosts  
198 (33), and perhaps for *B. burgdorferi* s.l. in some woodland bird species (34). Adult seabirds have  
199 high nest-site fidelity but young adults are known to prospect for new breeding locations,  
200 resulting in dispersal of birds, and perhaps *B. garinii*, among colonies (31, 35).

201         High genetic diversity has been documented in past studies of *B. garinii* in *I. uriae* and  
202 seabirds (14-16) and this was also observed in our data. Twelve STs are present in the 20 ticks  
203 analyzed, along with many unique alleles. A similarly high level of richness is also seen in  
204 Europe (36). In contrast, a much lower richness is observed in *B. burgdorferi* s.s. in North  
205 America, with 111 STs identified in 564 samples, although diversity of *B. burgdorferi* s.s does  
206 differ among geographic regions (37). *Borrelia garinii* is known to be one of the most

## *B. garinii* in the northwestern Atlantic

207 heterogeneous of the *Borrelia* species, having both high genetic and antigenic diversity (38). It is  
208 likely that the diversity found in our study is only a small snapshot of what actually exists in  
209 these seabird-tick ecosystems and more novel STs are likely to be found with further sampling,  
210 as was supported by the species accumulation analysis.

211         The *B. garinii* found in the northwestern Atlantic region show surprising  
212 phylogeographic relationships to sequences collected throughout Eurasia, from *I. uriae* in seabird  
213 colonies in the eastern Atlantic Ocean, non-marine ecosystems and humans. Our sequences are  
214 dispersed throughout the *B. garinii* MLST tree, and some show close relationships with those  
215 from throughout Eurasia. This suggests multiple movements of strains and mixing between  
216 regions (12, 15, 16, 39). When our samples are examined within the overall *B. garinii* clonal  
217 complex structure, they do cluster into the same complex and subpopulation. This reflects the  
218 highly clonal nature of this bacterium, with populations existing as clusters of closely related  
219 genotypes (or complexes) that are globally distributed and stable over time (40).

220         At a local level, our data show that a high level of *B. garinii* diversity exists in the  
221 northwestern Atlantic seabird colonies, with several independent and divergent clonal groups,  
222 consistent with what is found in the eastern Atlantic (15). The distribution of genotypes shows  
223 some heterogeneity. One cluster of STs (ST693, ST687, ST688, and ST689) originated solely  
224 from Common Murres on Gull Island in both 2012 and 2013. The other two clusters both  
225 comprise multiple ticks and originate from two or more colonies and two or more seabird hosts.  
226 Additionally, one cluster consists of STs primarily originating from non-Common Murre hosts,  
227 with four such ticks giving rise to three STs (ST694, ST684, and ST691) and a single Common  
228 Murre tick containing the other ST (ST244) in this cluster.

## *B. garinii* in the northwestern Atlantic

229           There was no relationship between ST diversity and geographic location or tick host  
230 based on the phylogenetic and BAPS analyses, which may suggest that there are no processes  
231 limiting transmission of the bacterium at either geographic or host levels. However, examination  
232 of the genetic distances between populations by  $F_{ST}$  analysis did show some level of  
233 differentiation. Significant genetic differentiation was observed across large geographic distances,  
234 with the Gannet and Little Fogo Islands different from Great and/or Gull Island in Witless Bay.  
235 These sites are approximately 500 and 300 km northwest from Witless Bay, respectively. This  
236 pattern may be driven by *I. uriae* population structure, which has been observed among colonies  
237 in Iceland and Norway (41-43). Vector-borne pathogens co-occur with their hosts and vectors,  
238 and the population genetic structure of hosts and vectors is expected to have a strong driving  
239 force on the microbe's structure (44, 45). Lack of genetic distance between Gull and Great  
240 Islands is not surprising as they are within 7 km of each other, share similar seabird species  
241 compositions, and would have the easiest opportunities for exchanges of birds, ticks and bacteria.

242           At the tick host level, genetic differentiation exists between STs found associated with  
243 Atlantic Puffins and Black-legged Kittiwakes (*Rissa tridactyla*), Common Murres, and  
244 Razorbills. Atlantic Puffins use a distinct breeding habitat, nesting in earthen burrows along  
245 grassy slopes (46, 47), whereas the other three species are found along rocky cliffs edges (48-  
246 50), or talus slopes (51). Therefore, the differences among bird species might be attributable to  
247 population structure at the level of *I. uriae* around their seabird hosts on a local geographic level  
248 (52, 53) and this could further drive the large geographic patterns seen. Population  
249 subdivisions, like those seen among these seabird species, may act as barriers to gene flow for  
250 these bacteria and other pathogens (i.e., multiple niche polymorphism (54)).

## *B. garinii* in the northwestern Atlantic

251 Overall, this study has contributed to a broader global understanding of *B. garinii*  
252 circulation. There is some evidence of host species associations and differentiation across larger  
253 geographic distances, but also connectivity among *B. garinii* found in seabird colonies of the  
254 northwestern and northeastern Atlantic Ocean and in humans and non-marine ticks of Eurasia.  
255 These connections suggest a complicated circulation system with movement across large  
256 geographic scales that we propose is linked to bird migration. More research is needed to  
257 determine the mechanism(s) connecting the marine and terrestrial ecosystems.

258

### 259 **Methods**

#### 260 **Ethics**

261 Birds were captured and banded under Environment Canada banding permit 10559. This  
262 work was carried out under the guidelines specified by the Canadian Council on Animal Care  
263 with approved protocols 11-01-AL, 12-01-AL, 13-01-AL, and 14-01-AL from the Memorial  
264 University Institutional Animal Care Committee. Lab work was approved under Biosafety  
265 Certificate S-103 from the Memorial University Biosafety Committee. Access to the Witless  
266 Bay, Gannet Islands, and Cape St. Mary's Ecological Reserves was through permits from the  
267 Parks and Natural Areas Division of the Newfoundland and Labrador Department of  
268 Environment and Conservation.

#### 269 ***Ixodes uriae* collection and *Borrelia* screening**

270 Between 2011 and 2014, *I. uriae* ticks were collected from four seabird colonies in the  
271 northwestern Atlantic Ocean region in Newfoundland and Labrador, Canada (Figure 1). Birds  
272 were captured for a range of research projects and long-term bird-banding programs. The bodies  
273 of birds were examined for ticks with special emphasis on the feet and head as these are areas  
274 where *I. uriae* are commonly attached (55-57). All tick life-stages were collected: larva, nymph,

## *B. garinii* in the northwestern Atlantic

275 and adult (Supplementary Table S1). Ticks were collected directly off birds or from nesting  
276 habitat. Ticks on hosts were removed with fine forceps and all ticks were placed in pre-labelled  
277 vials in the field and stored at -20°C or -80°C until processed further.

278 DNA was extracted from ticks using the DNeasy Kit (Qiagen). Samples were identified  
279 as *Borrelia*-positive using quantitative polymerase chain reaction (qPCR) targeting a conserved  
280 portion of the 23S rDNA (58). Positive samples were subsequently used for PCR amplification  
281 of genes used previously for *B. garinii* MLST (23): *clpA*, *clpX*, *nifS*, *pepX*, *pyrG*, *recG*, *rplB*, and  
282 *uvrA* (Supplementary Table S3). PCR amplifications were performed according to published  
283 protocols (23) using GoTaq (Promega). All PCR products were sequenced using Sanger  
284 sequencing technology at The Center for Applied Genomics (Toronto, Ontario). Sequences were  
285 visually examined for ambiguities, primer sequences were removed, forward and reverse  
286 sequences were aligned, and consensus sequences trimmed to the lengths of reference sequences  
287 using Geneious 8 (59). The possibility of mixed infections, indicated by mixed peaks on  
288 sequence chromatograms, was noted and data from such samples were not included in  
289 subsequent analyses.

290 All sequences were deposited in the NCBI GenBank database with the accession numbers  
291 MF536145-MF536294 and added to the pubMLST database (<http://pubmlst.org/borrelia/>).

### 292 **MLST analysis**

293 Sequences from this study were compared using the pubMLST database functions for  
294 sequence query (<http://pubmlst.org/borrelia/>) with each allele being ascribed a number  
295 corresponding to an existing identical allele, or a new number in the case that the allele sequence  
296 was new to the database. Submissions for new allele ID numbers or sequence types (STs) were  
297 made to the pubMLST database as appropriate. Based on allelic profiles of 8 housekeeping  
298 genes, each sample was assigned an existing or new (for sequences with new combinations of

## *B. garinii* in the northwestern Atlantic

299 alleles or novel alleles) ST number (23, 40). Species accumulation curves were plotted, in R  
300 using the package ‘vegan’ (60), to examine the increase in ST/allele richness as more samples  
301 are considered. The richness of STs was examined relative to geographic locations and host  
302 species. Due to uneven sample distribution across geographic locations and host species, and  
303 small sample size for some geographic locations and host species, richness was compared  
304 between Common Murres and other seabird species at Gull Island and other locations.

### 305 **Phylogenetic analysis**

306 To investigate the phylogenetic relationships among *B. garinii* STs, we used the 12 from  
307 this study along with all 130 others found within the pubMLST database, all of which originated  
308 from Eurasia. Sequences were aligned using MUSCLE (61). Model selection was performed  
309 using JModelTest (62, 63) for each locus and a maximum likelihood tree was produced using  
310 PhyML for the concatenated loci (64). Branch support was calculated using a Bayesian-like  
311 transformation of the approximate likelihood ratio test (aBayes) because of its high statistical  
312 power and calculation speed (65). The number of sequences visualized in the tree was limited to  
313 those closely related to ours for easier viewing, and the tree was rooted with *B. burgdorferi* s.s.  
314 due to its basal nature relative to *B. garinii* (66).

### 315 **Population structure analysis**

316 Using sequence data from the 12 STs from this study, two different pairwise  $F_{ST}$  analyses  
317 were performed in R (67) using the ‘hierfstat’ package (68) to determine the population structure  
318 based on colony of sample collection and seabird host. Genetic distance was computed using  $F_{ST}$   
319 as previously described (69). To determine the significance of the  $F_{ST}$  value, 10,000 bootstraps  
320 were performed, and the level of significance was altered from  $p < 0.05$  by Bonferroni correction  
321 to a  $p < 0.01$  to account for multiple pairwise comparisons. Genetic distances between  
322 populations based on colonies and seabird hosts were determined on this basis.

## *B. garinii* in the northwestern Atlantic

323 To identify clonal clustering of our sequences in relationship to all *B. garinii* STs, related  
324 clusters of MLST STs were ‘classified’ into clonal complexes using eBURST v3  
325 (<http://eburst.mlst.net/>) (70) and goeBURST v1.2.1 (71) and then uploaded into the Phyloviz v2  
326 program (72). This analysis was performed with all *B. garinii* STs in the pubMLST database as  
327 of April 2017. These programs are designed for use with MLST data and cluster STs using  
328 algorithms on a set of hierarchical rules related to the number of single-locus variants (SLVs),  
329 double-locus variants (DLVs; eBURST), and triple-locus variants (TLVs; goeBURST). eBURST  
330 uses local optimization and is based on a simple model of clonal expansion and divergence,  
331 whereas goeBURST allows for global optimization and the identification of the founder ST  
332 among the set of STs, and an extended set of tiebreak rules, which leads to improved graphic  
333 representation of clonal complexes relating to the ancestral links among ST components. This  
334 analysis provides a global perspective of relationships of new STs and previously described STs,  
335 showing founders for the populations and closely related samples based on clonal complexes, as  
336 opposed to a phylogeny. Nevertheless, clonal complexes from the MLST analysis and clades on  
337 the phylogenetic trees are often concordant (25, 73, 74).

338 The community structure of the different STs found within the northwestern Atlantic was  
339 computed with Bayesian Analysis of Population Structure (BAPS) version 6.0 (75), using  
340 clustering with a linked locus module and codon model. Mixture analysis was performed with K  
341 values from 1 to 12, and optimal partitions were identified based on maximum log marginal  
342 likelihood values. The analysis was repeated with all *B. garinii* STs in the pubMLST database to  
343 identify STs from across Eurasia that clustered with STs found in the northwestern Atlantic, with  
344 K values from 2 to 20. This provided an understanding of community structure of the samples

*B. garinii* in the northwestern Atlantic

345 from this study and how they fit together on a regional scale, as well as on a larger global scale,

346 and it allowed for clonal complexes to be classified into clusters.

347



*B. garinii* in the northwestern Atlantic

348 **References**

- 349 1. Postic D, Garnier M, Baranton G. 2007. Multilocus sequence analysis of atypical  
350 *Borrelia burgdorferi* sensu lato isolates – description of *Borrelia californiensis* sp. nov.,  
351 and genomospecies 1 and 2. Int J Med Microbiol 297:263-271.
- 352 2. Margos G, Piesman J, Lane RS, Ogden NH, Sing A, Straubinger RK, Fingerle V. 2014.  
353 *Borrelia kurtenbachii* sp. nov., a widely distributed member of the *Borrelia burgdorferi*  
354 sensu lato species complex in North America. Int J Syst Evol Microbiol 64:128-130.
- 355 3. Margos G, Lane RS, Fedorova N, Koloczek J, Piesman J, Hojgaard A, Sing A, Fingerle  
356 V. 2016. *Borrelia bissetiae* sp. nov. and *Borrelia californiensis* sp. nov. prevail in  
357 diverse enzootic transmission cycles. Int J Syst Evol Microbiol 66:1447-1452.
- 358 4. Cutler SJ, Ruzic-Sabljić E, Potkonjak A. 2016. Emerging borreliae – Expanding beyond  
359 Lyme borreliosis. Mol Cell Probes 31:22-27.
- 360 5. Baranton G, Postic D, Saint Girons I, Boerlin P, Piffaretti JC, Assous M, Grimont PA.  
361 1992. Delineation of *Borrelia burgdorferi* sensu stricto, *Borrelia garinii* sp. nov., and  
362 group VS461 associated with Lyme borreliosis. Int J Syst Bacteriol 42:378-383.
- 363 6. Stanek G, Strle F. 2003. Lyme borreliosis. The Lancet 362:1639-1647.
- 364 7. Margos G, Wilske B, Sing A, Hizo-Teufel C, Cao WC, Chu C, Scholz H, Straubinger  
365 RK, Fingerle V. 2013. *Borrelia bavariensis* sp. nov. is widely distributed in Europe and  
366 Asia. Int J Syst Evol Microbiol 63:4284-4288.
- 367 8. Kurtenbach K, De Michelis S, Etti S, Schafer SM, Sewell HS, Brade V, Kraiczy P. 2002.  
368 Host association of *Borrelia burgdorferi* sensu lato - the key role of host complement.  
369 Trends Microbiol 10:74-79.

*B. garinii* in the northwestern Atlantic

- 370 9. Radolf JD, Caimano MJ, Stevenson B, Hu LT. 2012. Of ticks, mice and men:  
371 understanding the dual-host lifestyle of Lyme disease spirochaetes. *Nat Rev Microbiol*  
372 10:87-99.
- 373 10. Olsen B, Jaenson TG, Noppa L, Bunikis J, Bergstrom S. 1993. A Lyme borreliosis cycle  
374 in seabirds and *Ixodes uriae* ticks. *Nature* 362:340-342.
- 375 11. Gylfe, Olsen B, Strasevicius D, Marti Ras N, Weihe P, Noppa L, Ostberg Y, Baranton G,  
376 Bergström S. 1999. Isolation of Lyme disease *Borrelia* from puffins (*Fratercula arctica*)  
377 and seabird ticks (*Ixodes uriae*) on the Faeroe Islands. *J Clin Microbiol* 37:890-896.
- 378 12. Olsen B, Duffy DC, Jaenson TG, Gylfe A, Bonnedahl J, Bergstrom S. 1995.  
379 Transhemispheric exchange of Lyme disease spirochetes by seabirds. *J Clin Microbiol*  
380 33:3270-3274.
- 381 13. Smith RP, Muzaffar SB, Lavers J, Lacombe EH, Cahill BK, Lubelczyk CB, Kinsler A,  
382 Mathers AJ, Rand PW. 2006. *Borrelia garinii* in seabird ticks (*Ixodes uriae*), Atlantic  
383 Coast, North America. *Emerg Infect Dis* 12:1909-1912.
- 384 14. Duneau D, Boulinier T, Gomez-Diaz E, Petersen A, Tveraa T, Barrett RT, McCoy KD.  
385 2008. Prevalence and diversity of Lyme borreliosis bacteria in marine birds. *Infect Genet*  
386 *Evol* 8:352-359.
- 387 15. Gomez-Diaz E, Boulinier T, Sertour N, Cornet M, Ferquel E, McCoy KD. 2011. Genetic  
388 structure of marine *Borrelia garinii* and population admixture with the terrestrial cycle of  
389 Lyme borreliosis. *Environ Microbiol* 13:2453-2467.
- 390 16. Comstedt P, Asokliene L, Eliasson I, Olsen B, Wallensten A, Bunikis J, Bergstrom S.  
391 2009. Complex population structure of Lyme borreliosis group spirochete *Borrelia*  
392 *garrinii* in subarctic Eurasia. *PLoS One* 4:e5841.

*B. garinii* in the northwestern Atlantic

- 393 17. Casjens SR, Mongodin EF, Qiu W-G, Luft BJ, Schutzer SE, Gilcrease EB, Huang WM,  
394 Vujadinovic M, Aron JK, Vargas LC, Freeman S, Radune D, Weidman JF, Dimitrov GI,  
395 Khouri HM, Sosa JE, Halpin RA, Dunn JJ, Fraser CM. 2012. Genome stability of Lyme  
396 disease spirochetes: comparative genomics of *Borrelia burgdorferi* plasmids. PLoS One  
397 7:e33280.
- 398 18. Fukunaga M, Takahashi Y, Tsuruta Y, Matsushita O, Ralph D, McClelland M, Nakao M.  
399 1995. Genetic and phenotypic analysis of *Borrelia miyamotoi* sp. nov., isolated from the  
400 ixodid tick *Ixodes persulcatus*, the vector for Lyme disease in Japan. Int J Syst Bacteriol  
401 45:804-810.
- 402 19. Wang G, Liveris D, Mukherjee P, Jungnick S, Margos G, Schwartz I. 2014. Molecular  
403 typing of *Borrelia burgdorferi*. Curr Protoc Microbiol 34:12C.5.1-12C.5.31.
- 404 20. Bunikis J, Garpmo U, Tsao J, Berglund J, Fish D, Barbour AG. 2004. Sequence typing  
405 reveals extensive strain diversity of the Lyme borreliosis agents *Borrelia burgdorferi* in  
406 North America and *Borrelia afzelii* in Europe. Microbiol 150:1741-1755.
- 407 21. Qiu W-GG, Dykhuizen DE, Acosta MS, Luft BJ. 2002. Geographic uniformity of the  
408 Lyme disease spirochete (*Borrelia burgdorferi*) and its shared history with tick vector  
409 (*Ixodes scapularis*) in the Northeastern United States. Genetics 160:833-849.
- 410 22. Hellgren O, Andersson M, Råberg L. 2011. The genetic structure of *Borrelia afzelii*  
411 varies with geographic but not ecological sampling scale. J Evol Biol 24:159-167.
- 412 23. Margos G, Gatewood AG, Aanensen DM, Hanincová K, Terekhova D, Vollmer SA,  
413 Cornet M, Piesman J, Donaghy M, Bormane A, Hurn MA, Feil EJ, Fish D, Casjens S,  
414 Wormser GP, Schwartz I, Kurtenbach K. 2008. MLST of housekeeping genes captures

*B. garinii* in the northwestern Atlantic

- 415 geographic population structure and suggests a European origin of *Borrelia burgdorferi*.  
416 Proc Natl Acad Sci U S A 105:8730-8735.
- 417 24. Mechai S, Margos G, Feil EJ, Lindsay LR, Ogden NH. 2015. Complex population  
418 structure of *Borrelia burgdorferi* in southeastern and south central Canada as revealed by  
419 phylogeographic analysis. Appl Environ Microbiol 81:1309-1318.
- 420 25. Mechai S, Margos G, Feil EJ, Barairo N, Lindsay LR, Michel P, Ogden NH. 2016.  
421 Evidence for host-genotype associations of *Borrelia burgdorferi* sensu stricto. PLoS One  
422 11:e149345.
- 423 26. Margos G, Vollmer SA, Cornet M, Garnier M, Fingerle V, Wilske B, Bormane A,  
424 Vitorino L, Collares-Pereira M, Drancourt M, Kurtenbach K. 2009. A new *Borrelia*  
425 species defined by multilocus sequence analysis of housekeeping genes. Appl Environ  
426 Microbiol 75:5410-5416.
- 427 27. Dietrich M, Gómez-Díaz E, McCoy KD. 2011. Worldwide distribution and diversity of  
428 seabird ticks: implications for the ecology and epidemiology of tick-borne pathogens.  
429 Vector Borne Zoonotic Dis 11:453-470.
- 430 28. Gomez-Diaz E, Doherty PF, Jr., Duneau D, McCoy KD. 2010. Cryptic vector divergence  
431 masks vector-specific patterns of infection: an example from the marine cycle of Lyme  
432 borreliosis. Evol Appl 3:391-401.
- 433 29. Eveleigh ES, Threlfall W. 1974. The biology of *Ixodes (Ceratiixodes) uriae* White, 1852  
434 in Newfoundland. Acarologia 16:621-635.
- 435 30. Barton TR, Harris MP, Wanless S. 1995. Natural attachment duration of nymphs of the  
436 tick *Ixodes uriae* (Acari: Ixodidae) on kittiwake *Rissa tridactyla* nestlings. Exp Appl  
437 Acarol 19:499-509.

*B. garinii* in the northwestern Atlantic

- 438 31. Frederiksen M, Descamps S, Erikstad KE, Gaston AJ, Gilchrist HG, Grémillet D,  
439 Johansen KL, Kolbeinsson Y, Linnebjerg JF, Mallory ML, McFarlane Tranquilla LA,  
440 Merkel FR, Montevecchi WA, Mosbech A, Reiertsen TK, Robertson GJ, Steen H, Strøm  
441 H, Thórarinsson TL. 2016. Migration and wintering of a declining seabird, the thick-  
442 billed murre *Uria lomvia*, on an ocean basin scale: conservation implications. Biol  
443 Conserv 200:26-35.
- 444 32. Frederiksen M, Moe B, Daunt F, Phillips RA, Barrett RT, Bogdanova MI, Boulinier T,  
445 Chardine JW, Chastel O, Chivers LS, Christensen-Dalsgaard S, Clément-Chastel C,  
446 Colhoun K, Freeman R, Gaston AJ, González-Solís J, Goutte A, Grémillet D, Guilford T,  
447 Jensen GH, Krasnov Y, Lorentsen S-H, Mallory ML, Newell M, Olsen B, Shaw D, Steen  
448 H, Strøm H, Systad GH, Thórarinsson TL, Anker-Nilssen T. 2012. Multicolony tracking  
449 reveals the winter distribution of a pelagic seabird on an ocean basin scale. Divers Distrib  
450 18:530-542.
- 451 33. Donahue JG, Piesman J, Spielman A. 1987. Reservoir competence of white-footed mice  
452 for Lyme disease spirochetes. Am J Trop Med Hyg 36:92-96.
- 453 34. Taragel'ová V, Koči J, Hanincová K, Kurtenbach K, Derdáková M, Ogden NH, Literák I,  
454 Kocianová E, Labuda M. 2008. Blackbirds and song thrushes constitute a key reservoir of  
455 *Borrelia garinii*, the causative agent of borreliosis in central Europe. Appl Environ  
456 Microbiol 74:1289-1293.
- 457 35. Breton AR, Diamond AW, Kress SW. 2006. Encounter, survival, and movement  
458 probabilities from an Atlantic Puffin (*Fratercula arctica*) metapopulation. Ecol Monogr  
459 76:133-149.

*B. garinii* in the northwestern Atlantic

- 460 36. James MC, Gilbert L, Bowman AS, Forbes KJ. 2014. The heterogeneity, distribution, and  
461 environmental associations of *Borrelia burgdorferi* sensu lato, the agent of Lyme  
462 borreliosis, in Scotland. *Front Public Health* 2:129.
- 463 37. Mechai S, Feil EJ, Garipey TD, Gregory TR, Lindsay LR, Millien V, Ogden NH. 2013.  
464 Investigation of the population structure of the tick vector of Lyme disease *Ixodes*  
465 *scapulari* (Acari: Ixodidae) in Canada using mitochondrial cytochrome C oxidase subunit  
466 I gene sequences. *J Med Entomol* 50:560-570.
- 467 38. Gern L, Humair PF. 2002. Ecology of *Borrelia burgdorferi* sensu lato in Europe, p 149-  
468 348. In Gray JS, Kahl O, Lane RS, Stanek G (ed), Lyme Borreliosis: Biology,  
469 Epidemiology and Control. CABI Publishing, Wallingford, UK.
- 470 39. Bunikis J, Olsén B, Fingerle V, Bonnedahl J, Wilske B, Bergström S. 1996. Molecular  
471 polymorphism of the lyme disease agent *Borrelia garinii* in northern Europe is influenced  
472 by a novel enzootic *Borrelia* focus in the North Atlantic. *J Clin Microbiol* 34:364-368.
- 473 40. Feil EJ, Enright MC. 2004. Analyses of clonality and the evolution of bacterial  
474 pathogens. *Curr Opin Microbiol* 7:308-313.
- 475 41. McCoy KD, Boulinier T, Chardine JW, Danchin E, Michalakis Y. 1999. Dispersal and  
476 distribution of the tick *Ixodes uriae* within and among seabird host populations: the need  
477 for a population genetic approach. *J Parasitol* 85:196-202.
- 478 42. Kempf F, Boulinier T, De Meeûs T, Arnathau C, McCoy KD. 2009. Recent evolution of  
479 host-associated divergence in the seabird tick *Ixodes uriae*. *Mol Ecol* 18:4450-4462.
- 480 43. Dietrich M, Kempf F, Boulinier T, McCoy KD. 2014. Tracing the colonization and  
481 diversification of the worldwide seabird ectoparasite *Ixodes uriae*. *Mol Ecol* 23:3292-  
482 3305.

*B. garinii* in the northwestern Atlantic

- 483 44. McCoy KD. 2008. The population genetic structure of vectors and our understanding of  
484 disease epidemiology. *Parasite* 15:444-448.
- 485 45. Woolhouse ME, Webster JP, Domingo E, Charlesworth B, Levin BR. 2002. Biological  
486 and biomedical implications of the co-evolution of pathogens and their hosts. *Nat Genet*  
487 32:569-577.
- 488 46. Harris MP. 1980. Breeding performance of puffins *Fratercula arctica* in relation to nest  
489 density, laying date and year. *Ibis* 120:193-209.
- 490 47. Lowther PE, Diamond AW, Kress SW, Robertson GJ, Russell K. 2002. Atlantic Puffin  
491 (*Fratercula arctica*). In Rodewald PG (ed), *The Birds of North America*  
492 doi:10.2173/bna.709. Cornell Lab of Ornithology, Ithaca, NY.
- 493 48. Hatch SA, Robertson GJ, Baird PH. 2009. Black-legged Kittiwake (*Rissa tridactyla*). In  
494 Rodewald PG (ed), *The Birds of North America* doi:10.2173/bna.92. Cornell Lab of  
495 Ornithology, Ithaca, NY.
- 496 49. Tuck LM. 1960. *The Murres*. Canadian Wildlife Service, Ottawa, Canada.
- 497 50. Ainley DG, Nettleship DN, Carter HR, Storey AE. 2002. Common Murre (*Uria aalge*).  
498 In Rodewald PG (ed), *The Birds of North America* doi:10.2173/bna.666. Cornell Lab of  
499 Ornithology, Ithaca, NY.
- 500 51. Lavers J, Hipfner JM, Chapdelaine G. 2009. Razorbill (*Alca torda*). In Rodewald PG  
501 (ed), *The Birds of North America* doi:10.2173/bna.635. Cornell Lab of Ornithology,  
502 Ithaca, NY.
- 503 52. Dietrich M, Beati L, Elguero E, Boulinier T, McCoy KD. 2013. Body size and shape  
504 evolution in host races of the tick *Ixodes uriae*. *Biol J Linn Soc Lond* 108:323-334.

*B. garinii* in the northwestern Atlantic

- 505 53. McCoy KD, Boulinier T, Schjørring S. 2002. Local adaptation of the ectoparasite *Ixodes*  
506 *uriae* to its seabird host. *Evol Ecol Res* 4:441-456.
- 507 54. Kurtenbach K, Hanincová K, Tsao JI, Margos G, Fish D, Ogden NH. 2006. Fundamental  
508 processes in the evolutionary ecology of Lyme borreliosis. *Nat Rev Microbiol* 4:660-669.
- 509 55. Eveleigh ES, Threlfall W. 1975. Bionomics of *Ixodes (Ceratiixodes) uriae* White, 1852 on  
510 auks (Alcidae) from Newfoundland. *Can J Zool* 53:82-86.
- 511 56. Durden LA, Keirans JE. 1996. Nymphs of the genus *Ixodes* (Acari: Ixodidae) of the  
512 United States: taxonomy, identification key, distribution, hosts, and medical/veterinary  
513 importance. Entomological Society of America, Lanham, MD.
- 514 57. Cooley RA, Kohls GM. 1945. The genus *Ixodes* in North America, vol 184. U.S. Public  
515 Health Service, Washington, DC.
- 516 58. Courtney JW, Kostelnik LM, Zeidner NS, Massung RF. 2004. Multiplex real-time PCR  
517 for detection of *Anaplasma phagocytophilum* and *Borrelia burgdorferi*. *J Clin Microbiol*  
518 42:3164-3168.
- 519 59. Kearse M, Moir R, Wilson A, Stones-Havas S, Cheung M, Sturrock S, Buxton S, Cooper  
520 A, Markowitz S, Duran C, Thierer T, Ashton B, Meintjes P, Drummond A. 2012.  
521 Geneious Basic: an integrated and extendable desktop software platform for the  
522 organization and analysis of sequence data. *Bioinformatics* 28:1647-1649.
- 523 60. Oksanen J, Blanchet FG, Friendly M, Kindt R, Legendre P, McGlinn D, Minchin PR,  
524 O'Hara RB, Simpson GL, Solymos P, Stevens MHH, Szoecs E, Wagner H. 2017. *vegan*:  
525 Community Ecology Package.
- 526 61. Edgar RC. 2004. MUSCLE: multiple sequence alignment with high accuracy and high  
527 throughput. *Nucleic Acids Res* 32:1792-1797.



*B. garinii* in the northwestern Atlantic

- 528 62. Posada D. 2008. jModelTest: phylogenetic model averaging. *Mol Biol Evol* 25:1253-  
529 1256.
- 530 63. Darriba D, Taboada GL, Doallo R, Posada D. 2012. jModelTest 2: more models, new  
531 heuristics and parallel computing. *Nat Methods* 9:772-772.
- 532 64. Guindon S, Dufayard J-F, Lefort V, Anisimova M, Hordijk W, Gascuel O. 2010. New  
533 algorithms and methods to estimate maximum-likelihood phylogenies: assessing the  
534 performance of PhyML 3.0. *Syst Biol* 59:307-321.
- 535 65. Anisimova M, Gil M, Dufayard J-F, Dessimoz C, Gascuel O. 2011. Survey of branch  
536 support methods demonstrates accuracy, power, and robustness of fast likelihood-based  
537 approximation schemes. *Syst Biol* 60:685-699.
- 538 66. Qiu WG, Martin CL. 2014. Evolutionary genomics of *Borrelia burgdorferi* sensu lato:  
539 findings, hypotheses, and the rise of hybrids. *Infect Genet Evol* 27:576-593.
- 540 67. R Development Core Team. 2008. R: a language and environment for statistical  
541 computing. R Foundation for Statistical Computing, Vienna, Austria.
- 542 68. Goudet J. 2005. hierfstat, a package for r to compute and test hierarchical F-statistics.  
543 *Mol Ecol Notes* 5:184-186.
- 544 69. Takezaki N, Nei M. 1996. Genetic distances and reconstruction of phylogenetic trees  
545 from microsatellite DNA. *Genetics* 144:389-399.
- 546 70. Feil EJ, Li BC, Aanensen DM, Hanage WP, Spratt BG. 2004. eBURST: inferring  
547 patterns of evolutionary descent among clusters of related bacterial genotypes from  
548 multilocus sequence typing data. *J Bacteriol* 186:1518-1530.

## *B. garinii* in the northwestern Atlantic

- 549 71. Francisco AP, Bugalho M, Ramirez M, Carriço JA. 2009. Global optimal eBURST  
550 analysis of multilocus typing data using a graphic matroid approach. BMC  
551 Bioinformatics 10:152.
- 552 72. Francisco AP, Vaz C, Monteiro PT, Melo-Cristino J, Ramirez M, Carrico JA. 2012.  
553 PHYLOViZ: phylogenetic inference and data visualization for sequence based typing  
554 methods. BMC Bioinformatics 13:87.
- 555 73. Ogden NH, Margos G, Aanensen DM, Drebot MA, Feil EJ, Hanincova K, Schwartz I,  
556 Tyler S, Lindsay LR. 2011. Investigation of genotypes of *Borrelia burgdorferi* in *Ixodes*  
557 *scapularis* ticks collected during surveillance in Canada. Appl Environ Microbiol  
558 77:3244-54.
- 559 74. Margos G, Tsao JI, Castillo-Ramírez S, Girard YA, Hamer SA, Hoen AG, Lane RS,  
560 Raper SL, Ogden NH. 2012. Two boundaries separate *Borrelia burgdorferi* populations  
561 in North America. Appl Environ Microbiol 78:6059-6067.
- 562 75. Corander J, Tang J. 2007. Bayesian analysis of population structure based on linked  
563 molecular information. Math Biosci 205:19-31.

564

## 565 **Acknowledgements**

566 This work was supported by the Natural Sciences and Engineering Research Council (NSERC)  
567 of Canada (341561 to A.S.L.), the Newfoundland and Labrador Forestry and Agrifoods Agency,  
568 the Public Health Agency of Canada, and the Memorial University of Newfoundland School of  
569 Graduate Studies (baseline funding to H.J.M.). We thank everyone who helped collect ticks and  
570 with all aspects of field work. We thank Marta Canuti and Joost Verhoeven for assistance with  
571 the phylogenetic analyses and Gabriele Margos for help with MLST assignments.

*B. garinii* in the northwestern Atlantic

572

573 **Author contributions statement**

574 H.J.M. performed sample collection, laboratory work, statistical analysis, and manuscript

575 writing. N.H.O. contributed to study design, data interpretation, and manuscript writing. S.M.

576 contributed to data interpretation, statistical analysis, and manuscript writing. L.R.L. contributed

577 to study design and manuscript writing. G.J.R. contributed to sample collection and manuscript

578 editing. H.W. contributed to study design and manuscript writing. A.S.L. contributed to data

579 interpretation and manuscript writing.

*B. garinii* in the northwestern Atlantic

580 Table 1. Sequence types (STs) by colony and tick host.

|                           | Number<br>of<br>samples | Number<br>of STs | Number of<br>new STs | Number (proportion)<br>of samples carrying<br>unique STs |
|---------------------------|-------------------------|------------------|----------------------|----------------------------------------------------------|
| <hr/>                     |                         |                  |                      |                                                          |
| Colony                    |                         |                  |                      |                                                          |
| <hr/>                     |                         |                  |                      |                                                          |
| Gull Island               | 13                      | 9                | 2                    | 6 (0.46)                                                 |
| Other                     | 7                       | 6                | 1                    | 3 (0.43)                                                 |
| <hr/>                     |                         |                  |                      |                                                          |
| Great Island              | 3                       | 2                | 0                    | 1 (0.33)                                                 |
| Little Fogo Islands       | 1                       | 1                | 1                    | 0                                                        |
| Gannet Islands            | 3                       | 3                | 0                    | 2 (0.67)                                                 |
| <hr/>                     |                         |                  |                      |                                                          |
| Host                      |                         |                  |                      |                                                          |
| <hr/>                     |                         |                  |                      |                                                          |
| Common Murre              | 12                      | 9                | 2                    | 7 (0.58)                                                 |
| Other                     | 8                       | 5                | 1                    | 3 (0.38)                                                 |
| <hr/>                     |                         |                  |                      |                                                          |
| Atlantic Puffin           | 5                       | 4                | 1                    | 1 (0.20)                                                 |
| Black-legged<br>Kittiwake | 1                       | 1                | 0                    | 0                                                        |
| Razorbill                 | 2                       | 2                | 0                    | 1 (0.50)                                                 |
| <hr/>                     |                         |                  |                      |                                                          |

581

*B. garinii* in the northwestern Atlantic

582 Table 2. Matrix of pairwise  $F_{ST}$  values of STs between colonies and bird species, with 99% CI.

| Location               | Gannet Islands    | Great Island           | Gull Island       |
|------------------------|-------------------|------------------------|-------------------|
| Great Island           | 0 (0-0)           |                        |                   |
| Gull Island            | 0.05 (0.01-0.08)* | 0 (0-0)                |                   |
| Little Fogo Islands    | 0.18 (0-0.32)     | 0.73 (0.32-0.17)*      | 0.23 (0.07-0.33)* |
| Host                   | Atlantic Puffin   | Black-legged Kittiwake | Common Murre      |
| Black-legged Kittiwake | 0.49 (0.28-0.65)* |                        |                   |
| Common Murre           | 0.25 (0.11-0.35)* | 0.01 (0-0.05)          |                   |
| Razorbill              | 0.70 (0.28-1)*    | 0 (0-0)                | 0 (0-0)           |

583 \*Significant comparisons ( $p < 0.01$ )

584

*B. garinii* in the northwestern Atlantic

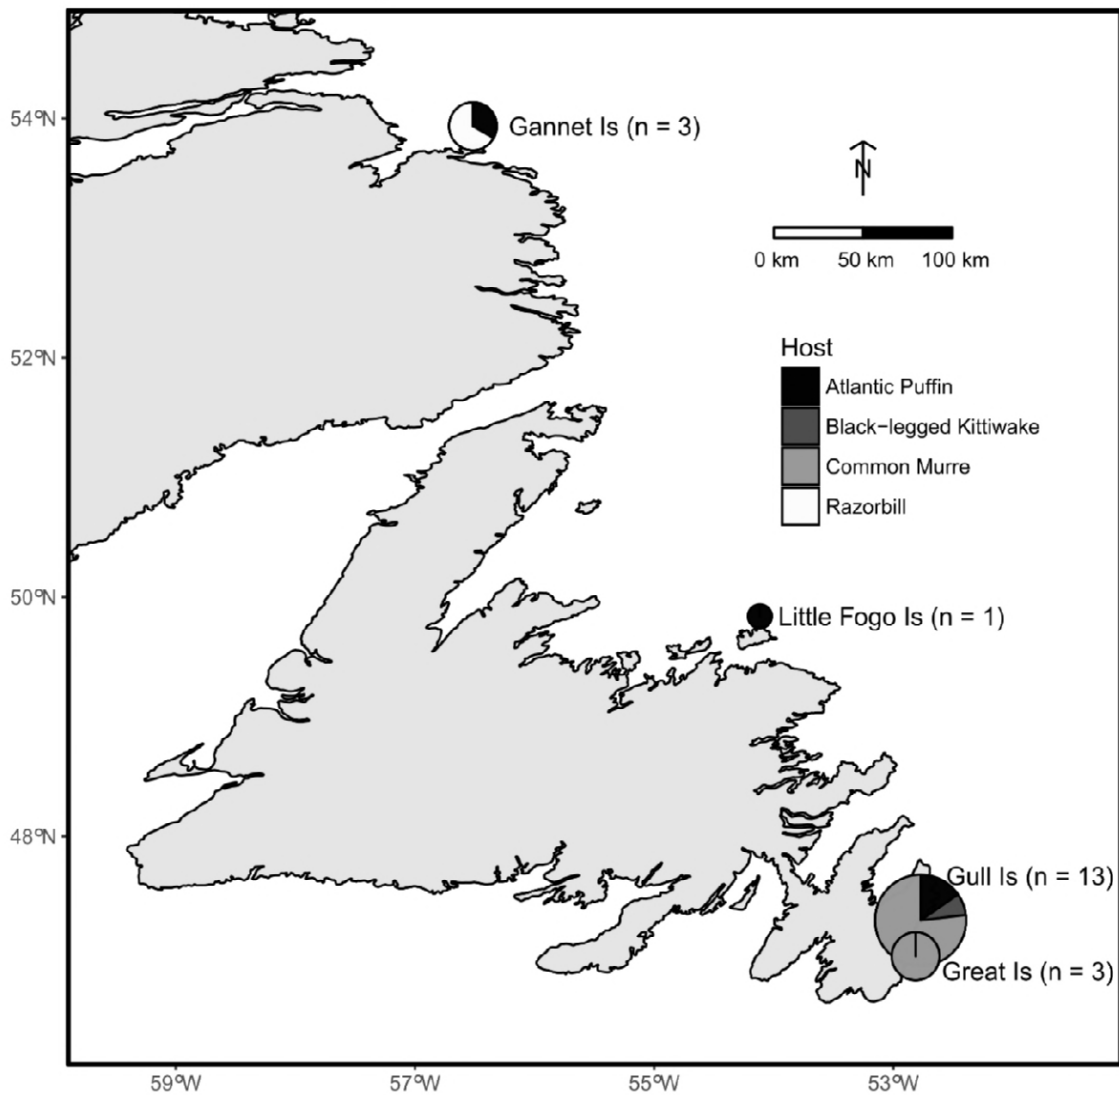

585

586 Figure 1. Geographic locations and avian host species compositions for *Ixodes uriae* sources of  
587 *Borrelia garinii* sequences used in this study. The proportions of the different host species are  
588 denoted in the pie charts and the numbers of *I. uriae* from each location are in brackets. The map  
589 was made using the package “maps” in R (67).

590

## *B. garinii* in the northwestern Atlantic

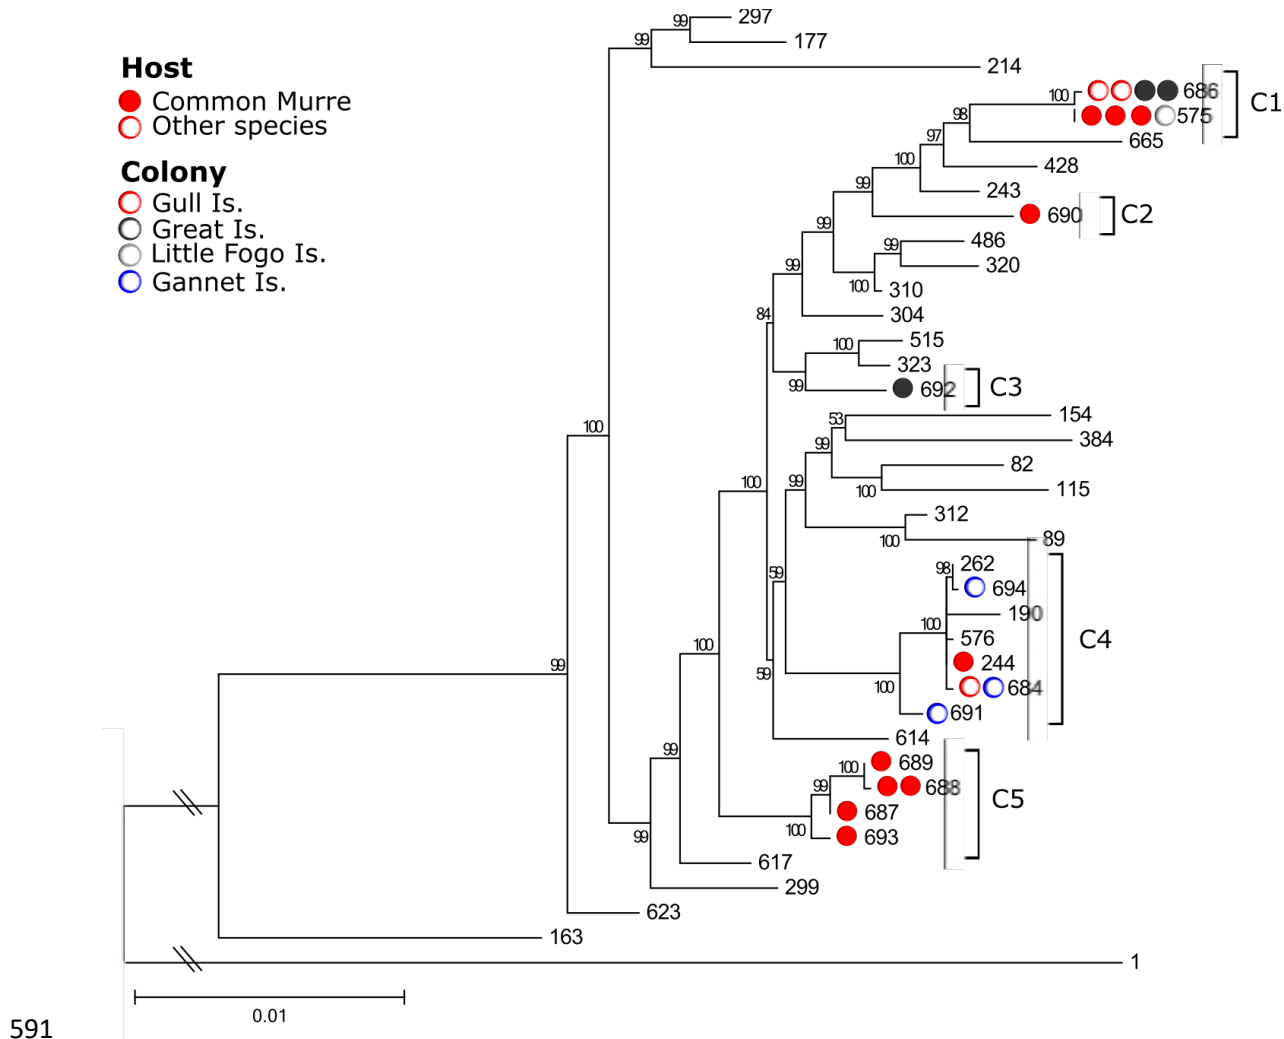

591

592 Figure 2. Phylogenetic analysis of *B. garinii* sequences in *I. uriae* from seabirds in the  
593 northwestern Atlantic Ocean. The maximum likelihood phylogeny was constructed using  
594 PhyML for eight concatenated MLST genes (*clpA*, *clpX*, *nifS*, *pepX*, *pyrG*, *recG*, *rplB*, and  
595 *uvrA*). Labels are sequence types (STs) from the pubMLST database. Sequences from this study  
596 are denoted with circles, where colors indicate colony, filled circles represent samples from  
597 Common Murres, and empty circles are all other bird species. *Borrelia burgdorferi* s.s was used  
598 as the outgroup, labeled as "1". Numbers at branch nodes represent support based on aBayes and  
599 the scale bar represents the number of substitutions per site. The five branches/clades with  
600 sequences from this study are denoted C1 through C5.

## *B. garinii* in the northwestern Atlantic

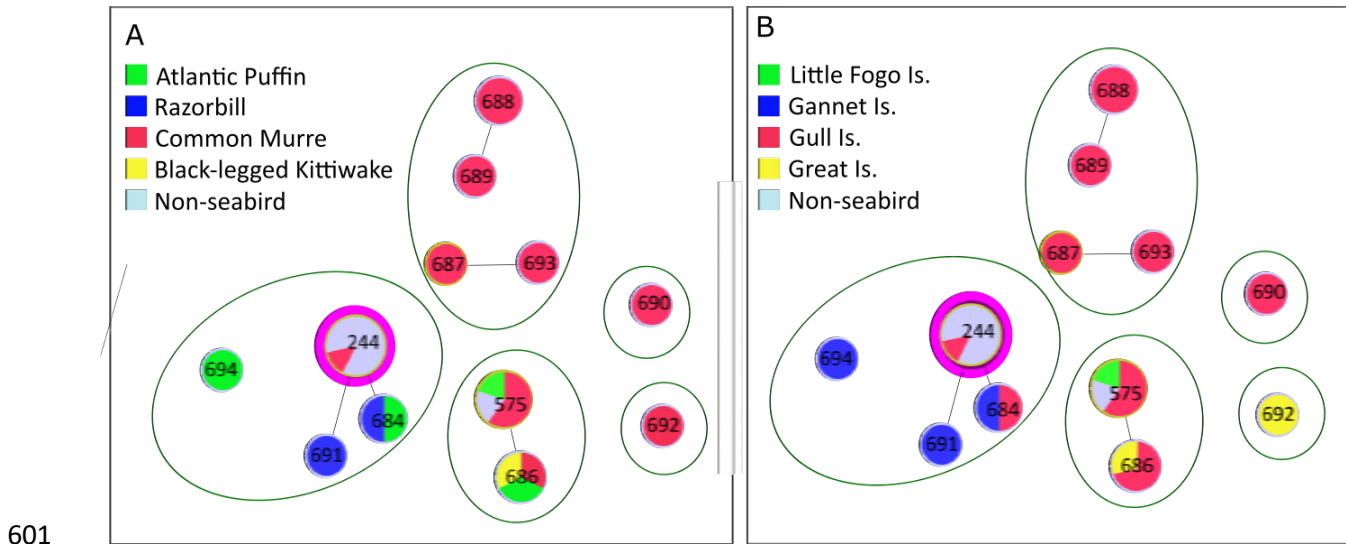

602 Figure 3. goeBURST network of the 12 sequences types (STs) of *B. garinii* from this study. The  
603 STs are highlighted by seabird host (A) and colony (B). The lines denote connections within  
604 clonal complexes. The sizes of the circles are proportional to number of samples in the STs. The  
605 dark green circles denote BAPS clusters. Inferred founder STs with > 60% bootstrap support are  
606 highlighted in pink. Reference sequences originating from sources other than seabirds are  
607 indicated in light blue.
